# Supplementary material for: Production of fatty alcohols from non-edible oils by enzymatic cascade reactions
Source: Royal Society of Chemistry journal article supplement (doi:10.1039/d0se00848f), 2020-01-01
Supplement: d0se00848f1.pdf [file d0se00848f1.pdf]

## Supporting Information

### **Production of fatty alcohols from non-edible oils by enzymatic cascade reactions**

Yunjian Ma,<sup>[a]</sup> Xizhen Zhang,<sup>[b]</sup> Yongru Li,<sup>[a]</sup> Peilin Li,<sup>[a]</sup> Frank Hollmann,<sup>\*[c]</sup> and  
Yonghua Wang<sup>\*[a]</sup>

[a] School of Food Science and Engineering; Overseas Expertise Introduction Center for  
Discipline Innovation of Food Nutrition and Human Health (111 Center), South China  
University of Technology, Guangzhou 510640, China.

[b] School of Biology and Biological Engineering, South China University of Technology,  
Guangzhou 510006, China.

[c] Department of Biotechnology, Delft University of Technology, Van der Maasweg 9,  
2629HZ, Delft, The Netherlands.

F.Hollmann@tudelft.nl (Frank Hollmann); yonghw@scut.edu.cn (Yonghua Wang)

## Experimental Procedures

### Chemical reagents and materials

All chemicals were purchased from Aladdin, TCL etc. in the highest purity available and used without further purification (Table S1). Lipase ROL (*Rhizopus oryzae* lipase on resin) was friendly provided by Guangdong VTR Bio-Tech Co., Ltd (Zhuhai, China), (the immobilized enzyme of ROL contains 20 mg pure enzyme per gram, the hydrolytic activity of immobilized ROL enzyme is 200000 U g<sup>-1</sup> immobilized enzyme). Castor oil were friendly provided by Guangzhou Zhizhiyuan Oil Industry Co., Ltd. (Guangzhou, China). Water was purified with Millipore (Bedford, MA) Milli-Q water system.

**Table S1.** Detail of all chemicals used in this experiment.

| Chemical      | Purity | Manufacturer                                 |
|---------------|--------|----------------------------------------------|
| Octanol       | 99%    | Aladdin, China                               |
| Ethyl acetate | 99%    | Aladdin, China                               |
| HCl           | 37%    | Guangzhou Chemical Reagent<br>Factory, China |
| Tris          | AR     | Sixin, China                                 |
| DMSO          | AR     | Fuyu, China                                  |
| Isopropanol   | AR     | Aladdin, China                               |
| Formic acid   | AR     | Kermel, China                                |

|                        |     |                  |
|------------------------|-----|------------------|
| N-hexane               | AR  | Richjoint, China |
| 12-hydroxystearic acid | 98% | Aladdin, China   |
| 16-hydroxystearic acid | 98% | TCL, China       |
| Ricinoleic acid        | 98% | Aladdin, China   |

### Details of product separation and detection

The products after enzymatic hydrolysis of castor oil were analyzed using a HPLC (Waters, 1525) equipped with a phenomenex luna silica column (250 mm × 4.6 mm i.d., 5 μm particle size, Phenomenex Corporation, Torrance, CA, America) and a refractive index detector (Waters, 2414). Injection quantity: 10 μL. The mobile phase was a mixture of *n*-hexane, 2-propanol and formic acid (33: 1: 0.003, v: v: v) and performed with a flow rate of 1 mL min<sup>-1</sup> at 30°C. The retention time for castor acid and castor oil were 6.51 min and 8.88 min, respectively (Figure S1A). Waters 2695 integration software was employed to calculate the peak-areas percentages.

An Agilent 7890B GC system (Agilent Technologies, Palo Alto, CA, USA) was used together with an KB-FFAP GC column (Kromat Corporation, 4 Providence Court, Delran, NJ08075, USA. 30 m length × 0.25 mm I.D. × 0.25 μm film thickness) for the detection of alkanes / alkenes and free fatty acids of the bienzymatic synthesis. The injector temperature: 250°C; split mode: 30:1; detector temperature: 280°C; GC oven temperature program: initial 110°C, hold for 3.4 min, then from 110°C to 190°C at a ramp rate of 25°C min<sup>-1</sup>, hold for 2.1 min, from 190 to 230°C at a ramp rate of 25°C min<sup>-1</sup>, then hold for 2 min, from 230 to 250°C at a ramp rate of 30°C min<sup>-1</sup>, then hold for 20 min. The effect diagram of test and analysis is shown in Figure S1B. The retention time for ethyl acetate, *n*-octanol (internal standard) and (*R*, *Z*)-heptadec-9-en-7-ol were 1.66 min, 4.81 min and 10.01 min, respectively.

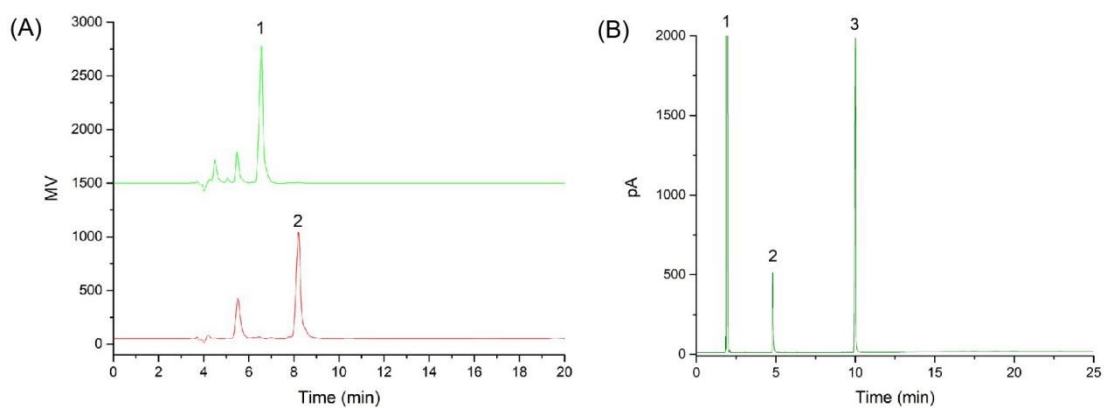

**Figure S1.** Chromatographic charts of various reaction substrates and products.

(A): HPLC chromatography of castor oil and castor acid: 1. castor acid, 2. castor oil; (B): GC chromatography of (*R, Z*)-heptadec-9-en-7-ol: 1. ethyl acetate, 2. n-octanol (internal standard), 3. (*R, Z*)-heptadec-9-en-7-ol)

### **Preparation of the cell free extract containing CvFAP (CFE CvFAP) and whole cell CvFAP (CvFAP@*E. coli*)**

Production and isolation of recombinant CvFAP enzyme conducted in *Escherichia coli* according to the method previously reported with minor modification<sup>[1-3]</sup>.

#### **Cultivation protocol:**

(1) Pre-culture: pre-culture was inoculated with *E. coli* BL21 (DE3) cells harboring the designed pET28a-His-Trx-CvFAP plasmid, and overnight culture (ONC) in terrific broth medium (TB medium: (yeast extract 2.4% (w/v), peptone 1.2% (w/v), glycerol 0.4% (v/v), 72 mM K<sub>2</sub>HPO<sub>4</sub>, 17 mM KH<sub>2</sub>PO<sub>4</sub>) containing 50 µg mL<sup>-1</sup> kanamycin, incubation at 37°C under 200 rpm.

(2) Main culture: the main culture consisted of 500 mL TB medium and 50 µg mL<sup>-1</sup> kanamycin in 2 L Erlenmeyer flask, inoculated with the corresponding volume of the ONC constituting a start OD<sub>600</sub> of 0.1. The main culture was incubated at 37°C, 200 rpm for approx. 3 - 4 h until reach an OD<sub>600</sub> value of 0.7 - 0.8.

(3) Induction: after reaching the desired OD<sub>600</sub>, protein production was induced by the addition of 0.5 mM IPTG and the cells were left at 17°C and 180 rpm for about 20 h.

(4) Harvest: The cell pellet was collected by centrifugation (4000 × g, 30 min, 4°C) followed by supersonic treatment to get the cell free extract containing CvFAP (CFE CvFAP). Washed with Tris-HCl buffer (50 mM, pH 8, containing 100 mM NaCl), and centrifuged again (10000 × g, 20 min, 4°C). The cell pellet was resuspended in the same buffer, and 1 mM PMSF and 5% glycerol (w/v) was added to the soluble fraction, the cell extract was separated into aliquots, frozen in liquid nitrogen, and stored at -20°C. In order to collect the whole cell CvFAP (CvFAP@*E. coli*), the cell pellet was collected by centrifugation (4000 × g, 30 min, 4°C). Washed with Tris-HCl buffer (50 mM, pH 8, containing 100 mM NaCl), and centrifuged again (10000 × g, 20 min, 4°C). The cell pellet was resuspended in the same buffer, and 1 mM PMSF and 5% glycerol (w/v) was added to the soluble fraction, the CvFAP@*E. coli* frozen in liquid nitrogen, and stored at -20°C. 1 g of wet CvFAP@*E. coli* corresponds to 250 mg dry CvFAP@*E. coli*. As a control, a whole cell of *E. coli* BL21 (DE3) cells harboring an empty pET28a vector was prepared according to the same protocol.

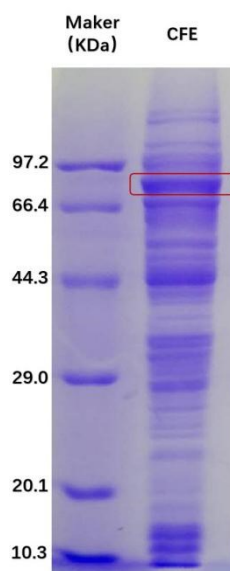

**Figure S2.** SDS-PAGE analysis of the CFE CvFAP<sup>[3]</sup>.

From left to right: (1) Molecular weight marker; (2) CFE CvFAP (Molecular weight of the CvFAP construct 6xHisTrxA-TEV-CvFAP(short-length): 77.0 kDa).

### **Photoenzymatic decarboxylation of hydroxy fatty acids catalysed by CFE CvFAP and CvFAP@*E. coli***

The hydroxy fatty acids standard photoenzymatic decarboxylation reactions catalysed by CFE CvFAP and CvFAP@*E. coli* were performed at 30°C (unless indicated otherwise) in a total volume of 1.0 mL Tris-HCl buffer (pH 8.5, 100 mM) containing 30% DMSO as cosolvent.

For CFE CvFAP photoenzymatic decarboxylation reaction, 700 µL of Tris-HCl buffer (pH 8.5, 100 mM) containing 8 mmol CFE CvFAP and 300 µL of hydroxy fatty acids stock solution in DMSO were added to a transparent glass vial. The final conditions of this reaction were: DMSO 30% (v: v), [CFE CvFAP] = 8 µM, [hydroxy fatty acid] = 50 mM. For CvFAP@*E. coli* photoenzymatic decarboxylation reaction, 700 µL of Tris-HCl buffer (pH 8.5, 100 mM) containing 0.35 g wet CvFAP@*E. coli* and 300 µL of hydroxy fatty acid stock solution in DMSO were added to a transparent glass vial (total reaction volume is 1 mL). The final conditions of this reaction were: DMSO 30% (v: v), [Wet CvFAP@*E. coli*] = 0.35 g mL<sup>-1</sup>, [hydroxy fatty acid] = 50 mM.

Reaction mixtures were thermostatted at the reaction temperatures indicated, stirred at 500 rpm and illuminated with blue LEDs (10 W, 220 V) for 24 h, the reaction temperature is 30°C. Afterwards, the entire reaction mixtures were extracted with ethyl acetate (containing 25 mM of 1-octanol as internal reference) in a 2: 1 ratio (v: v) and analyzed via GC chromatography. The homemade experimental setup is shown in Figure S3.

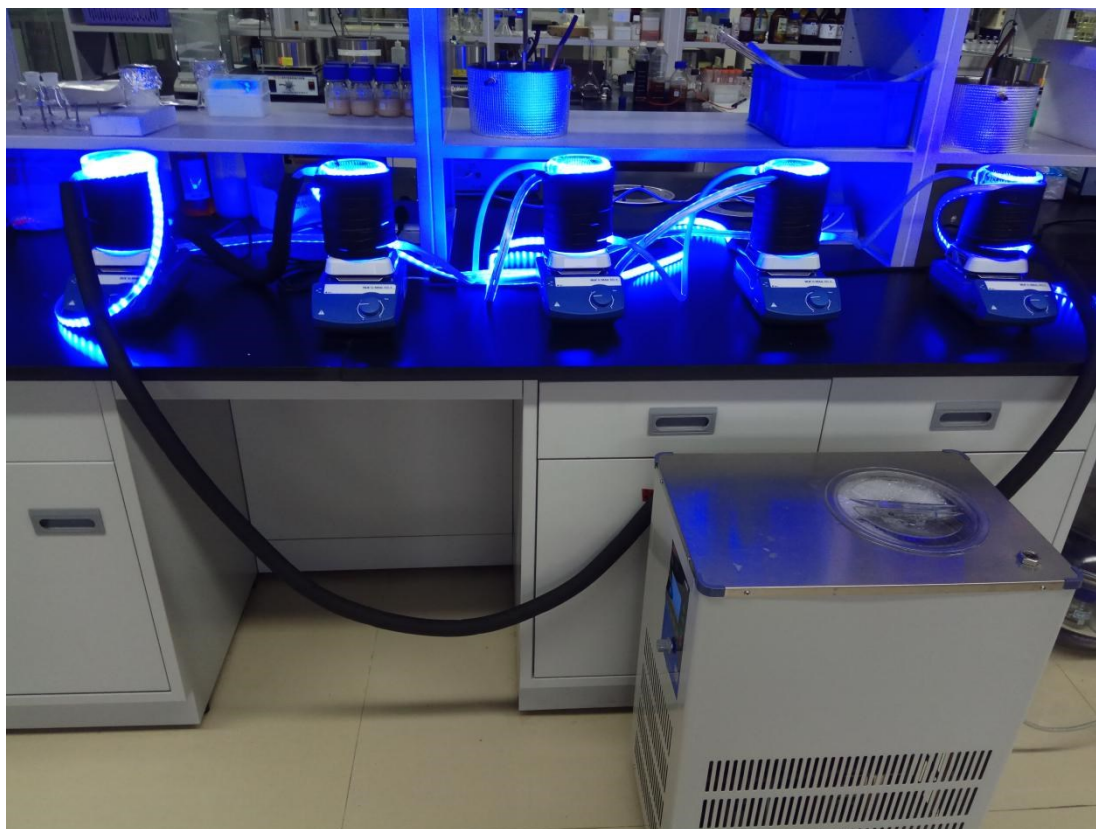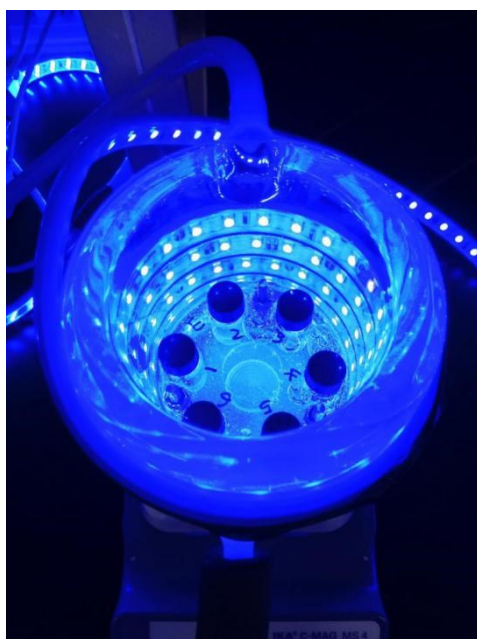

**Figure S3.** Image of homemade photoenzymatic decarboxylation reaction setup used in the experiment<sup>[3]</sup>.

### **Enzymatic hydrolysis reactions of castor oil**

The enzymatic hydrolysis reactions of castor oil were performed in a 5 mL glass bottle containing 500  $\mu$ L of castor oil, 500  $\mu$ L Tris-HCl buffer (pH 8.5, 100 mM) together with 100 mg of Lipase ROL (*Rhizopus oryzae* lipase on resin). The reaction flasks were placed into oil bath with 500 rpm of the rotate speed at 30°C for 24 h. After the reaction is over, the mixture was centrifuged at 10000  $\times$  g for 3 minutes. The upper layer (reservoir) will be used for high performance liquid chromatography (HPLC) analysis. Absorbing 30  $\mu$ L upper reservoir into the 1.5 mL chromatographic bottle, then dissolve and mix well with 970  $\mu$ L mobile phase (mixture of *n*-hexane, 2-propanol and formic acid (33: 1: 0.003, v: v: v)) for HPLC analysis.

### **One-pot-one-step hydrolysis/decarboxylation reaction cascade transforming castor oil into fatty alcohols**

700  $\mu$ L of Tris-HCl buffer (pH 8.5, 100 mM) containing 0.35 g wet CvFAP@*E. coli*, 50 mg ROL and 50  $\mu$ L of castor oil were added to a transparent glass vial (total reaction volume is 1 mL). The final conditions of this reaction were: [Wet CvFAP@*E. coli*] = 0.35 g mL<sup>-1</sup>, [ROL] = 0.05 g mL<sup>-1</sup>, [Castor oil] = 50  $\mu$ L mL<sup>-1</sup>. Reaction mixtures were thermostatted at the reaction temperatures indicated, stirred at 500 rpm and illuminated with blue LEDs (10 W, 220 V) for 24 h. Afterwards, the entire reaction mixtures were extracted with ethyl acetate (containing 25 mM of 1-octanol as internal reference) in a 2: 1 ratio (v: v) and analyzed via GC chromatography.

**Table S2.** The investigations of key factors to influence castor oil hydrolysis catalyzed by lipase ROL

| Entry | ROL (mg mL <sup>-1</sup> ) | Reaction time (h) | pH  | Phase ratio (oil: buffer (vol:vol)) | T (°C) | Degree of hydrolysis (%) <sup>a</sup> |
|-------|----------------------------|-------------------|-----|-------------------------------------|--------|---------------------------------------|
| 1     | 10                         | 24                | 8.5 | 500: 500                            | 30     | 43.5±8.0                              |
| 2     | 20                         | 24                | 8.5 | 500: 500                            | 30     | 83.6±7.7                              |
| 3     | 30                         | 24                | 8.5 | 500: 500                            | 30     | 91.5±5.8                              |
| 4     | 50                         | 24                | 8.5 | 500: 500                            | 30     | 95.5±1.6                              |
| 5     | 75                         | 24                | 8.5 | 500: 500                            | 30     | 97.1±1.1                              |



|    |     |    |     |          |    |                       |
|----|-----|----|-----|----------|----|-----------------------|
| 6  | 100 | 24 | 8.5 | 500: 500 | 30 | 97.4±0.7              |
| 7  | 50  | 0  | 8.5 | 500: 500 | 30 | 1.1±0.2               |
| 8  | 50  | 2  | 8.5 | 500: 500 | 30 | 83.1±0.8              |
| 9  | 50  | 4  | 8.5 | 500: 500 | 30 | 85.4±1.0              |
| 10 | 50  | 6  | 8.5 | 500: 500 | 30 | 85.5±4.5              |
| 11 | 50  | 8  | 8.5 | 500: 500 | 30 | 85.3±2.2              |
| 12 | 50  | 12 | 8.5 | 500: 500 | 30 | 88.4±1.5              |
| 13 | 50  | 24 | 8.5 | 500: 500 | 30 | 94.5±2.3              |
| 14 | 50  | 36 | 8.5 | 500: 500 | 30 | 97.9±0.3              |
| 15 | 50  | 48 | 8.5 | 500: 500 | 30 | 97.1±0.9              |
| 16 | 50  | 24 | 7.0 | 500: 500 | 30 | 91.4±5.1              |
| 17 | 50  | 24 | 8.0 | 500: 500 | 30 | 95.3±0.8              |
| 18 | 50  | 24 | 8.5 | 500: 500 | 30 | 96.2±0.4              |
| 19 | 50  | 24 | 9.0 | 500: 500 | 30 | 89.5±8.3              |
| 20 | 50  | 24 | 8.5 | 50: 950  | 30 | 95.0±1.1              |
| 21 | 50  | 24 | 8.5 | 100: 900 | 30 | 90.2±1.3              |
| 22 | 50  | 24 | 8.5 | 300: 700 | 30 | 97.6±0.3              |
| 23 | 50  | 24 | 8.5 | 500: 500 | 30 | 97.2±1.5              |
| 24 | 50  | 24 | 8.5 | 900: 100 | 30 | 85.2±5.1              |
| 25 | 50  | 24 | 8.5 | 500: 500 | 20 | 96.1±1.7 <sup>b</sup> |
|    |     |    |     |          |    | 93.0±0.2              |
| 26 | 50  | 24 | 8.5 | 500: 500 | 30 | 98.1±0.2 <sup>b</sup> |
|    |     |    |     |          |    | 97.7±0.4              |
| 27 | 50  | 24 | 8.5 | 500: 500 | 37 | 95.7±4.3 <sup>b</sup> |
|    |     |    |     |          |    | 95.8±0.4              |

<sup>a</sup> Degree of hydrolysis:  $[\text{substrate}]^{-1}_{\text{initial}} \times ([\text{substrate}]_{\text{final}} - [\text{substrate}]_{\text{initial}})$ . <sup>b</sup> performed under blue light ( $\lambda=450\text{nm}$ ), all other non-special instructions indicate normal daylight. Mean  $\pm$  SD (n=3).

**Table S3.** Activity of CvFAP crude cell extracts or whole cells on several hydroxy fatty acids.

| Substrate                 | 16-Hydroxy-<br>Hexadecenoic acid | 12-<br>HydroxyStearic<br>acid | Ricinoleic acid |
|---------------------------|----------------------------------|-------------------------------|-----------------|
| CvFAP crude cell extracts | 17.3±1.6                         | 30.8±11.8                     | 40.9±0.4        |
| CvFAP whole cells         | 13.9±0.5                         | 30.5±0.3                      | 37.9±6.6        |

Conditions: 700  $\mu$ L of Tris-HCl buffer (pH 8.5, 100 mM) containing 0.35 g wet CvFAP@*E. coli* (or 8 mmol CvFAP crude cell extracts) and 300  $\mu$ L of hydroxy fatty acids with hydroxyl groups stock solution in DMSO were added to a transparent glass vial (total reaction volume is 1 mL). The final conditions of this reaction were: DMSO 30% (v: v), [Wet CvFAP@*E. coli*] = 0.35 g mL<sup>-1</sup> or [CvFAP crude cell extracts] = 8  $\mu$ M, [hydroxy fatty acid] = 50 mM, 30°C, 10W blue LED, 24 h. Mean  $\pm$  SD (n=3).

**Table S4.** Influence of the key factors on the bienzymatic synthesis of (R, Z)-octadec-9-en-7-ol<sup>a</sup>.

| Entry | Stirring speed (rpm) | pH   | Phase ratio              |  | T (°C) | Con <sub>(R, Z)-octadec-9-en-7-ol</sub> [mM] <sup>b</sup> |
|-------|----------------------|------|--------------------------|--|--------|-----------------------------------------------------------|
|       |                      |      | (oil: buffer (vol:vol) ) |  |        |                                                           |
| 1     | 500                  | 8.5  | 50: 950                  |  | 30     | 41.7±5.7                                                  |
| 2     | 800                  | 8.5  | 50: 950                  |  | 30     | 37.0±6.4                                                  |
| 3     | 1000                 | 8.5  | 50: 950                  |  | 30     | 22.7±5.1                                                  |
| 4     | 500                  | 7.0  | 50: 950                  |  | 30     | 8.6±2.7                                                   |
| 5     | 500                  | 8.0  | 50: 950                  |  | 30     | 6.9±2.0                                                   |
| 6     | 500                  | 8.5  | 50: 950                  |  | 30     | 35.1±10.6                                                 |
| 7     | 500                  | 9.0  | 50: 950                  |  | 30     | 44.8±11.5                                                 |
| 8     | 500                  | 10.0 | 50: 950                  |  | 30     | 56.7±1.1                                                  |
| 9     | 500                  | 8.5  | 50: 950                  |  | 30     | 36.0±16.6                                                 |
| 10    | 500                  | 8.5  | 100: 900                 |  | 30     | 42.6±10.2                                                 |
| 11    | 500                  | 8.5  | 200: 800                 |  | 30     | 22.9±4.9                                                  |
| 12    | 500                  | 8.5  | 500: 500                 |  | 30     | 24.6±5.5                                                  |
| 13    | 500                  | 8.5  | 50: 950                  |  | 20     | 11.0±6.5                                                  |

|    |     |     |         |    |          |
|----|-----|-----|---------|----|----------|
| 14 | 500 | 8.5 | 50: 950 | 30 | 31.4±2.3 |
| 15 | 500 | 8.5 | 50: 950 | 37 | 17.9±7.6 |

<sup>a</sup> The final conditions of this reaction were: [Wet CvFAP@*E. coli*] = 0.35 g mL<sup>-1</sup>, [lipase ROL] = 50 mg mL<sup>-1</sup>, 10 W blue LED, 24 h. <sup>b</sup>Mean ± SD (n = 3).

## REFERENCES

- [1] M. Huijbers, W. Zhang, F. Tonin, F. Hollmann, *Angew. Chem. Int. Edit.*, **2018**, *57*, 13648-13651.
- [2] W. Zhang, M. Ma, M. Huijbers, G. Filonenko, E. Pidko, M. Schie, S. Boer, B. Burek, J. Bloh, W. Berkel, W. Smith, F. Hollmann, *J. Am. Chem. Soc.*, **2019**, *141*, 3116-3120.
- [3] Y. Ma, X. Zhang, W. Zhang, P. Li, Y. Li, F. Hollmann, Y. Wang, *ChemPhotoChem*, **2020**, *4*, 39–44.
